# Supplementary material
Source: Springer Nature journal article supplement (https://www.springermedizin.de/resource/supplementary/13033_2011_112_MOESM5_ESM.pdf/9651880)
Supplement: MOESM5 [file 9651880]

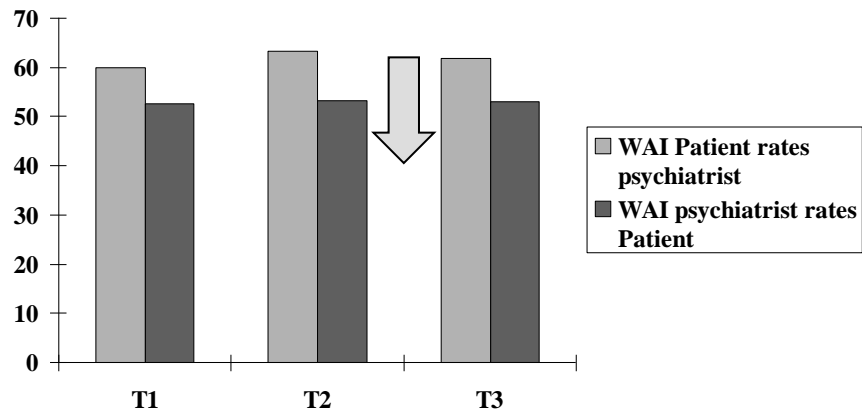

WAI-Patient rates psychiatrist general linear model  $F=0.2$ ,  $df=1$ ,  $p=0.7$

WAI-Psychiatrist rates Patient  $F=0.1$ ,  $df=1$ ,  $p=0.7$

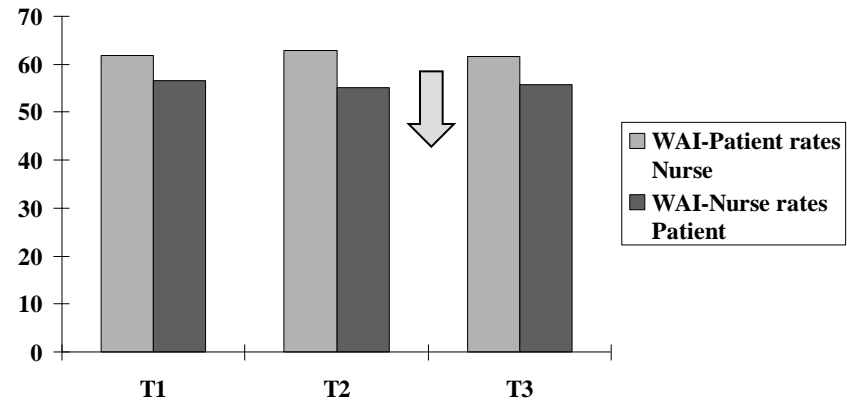

WAI-Patient rates Nurse general linear model  $F=1.2$ ,  $df=1$ ,  $p=0.3$

WAI-Nurse rates Patient  $F=0.6$ ,  $df=1$ ,  $p=0.4$

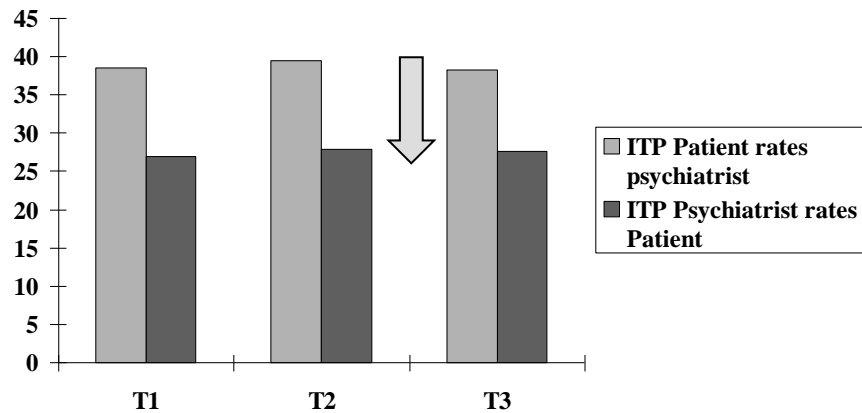

ITP-Patient rates Psychiatrist general linear model  $F=1.9$ ,  $df=1$ ,  $p=0.2$

ITP-Psychiatrist rates Patient  $F=0.3$ ,  $df=1$ ,  $p=0.6$

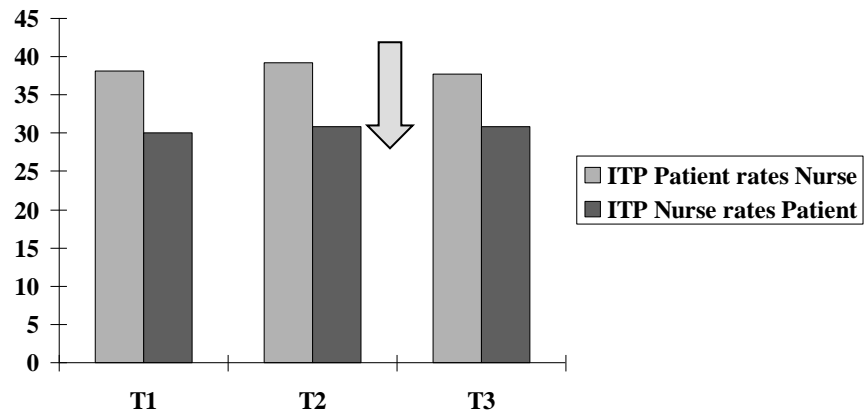

ITP-Patient rates Nurse general linear model  $F=1.3$ ,  $df=1$ ,  $p=0.3$

ITP-Nurse rates Patient  $F=1.4$ ,  $df=1$ ,  $p=0.25$
